# Supplementary material
Source: PubMed Central journal article supplement (PMC9059254)
Supplement: NIHMS1798123-supplement-Supplementary_Online_Content.pdf [file NIHMS1798123-supplement-Supplementary_Online_Content.pdf]

## Supplementary Online Content

Grummitt LR, Kreski NT, Kim SG, Platt J, Keyes KM, McLaughlin KA. Association of childhood adversity with morbidity and mortality in US adults: a systematic review. *JAMA Pediatr*. Published online October 4, 2021. doi:10.1001/jamapediatrics.2021.2320

**eTable 1.** Search Terms Used for Electronic Databases

**eFigure.** Screening Flow Chart of a Systematic Review of Meta-Analyses

**eTable 2.** References of Meta-Analyses Included in the Estimates of Associations Between Childhood Adversity and Health Outcomes by Exposure Examined

**eTable 3.** Prevalence of Childhood Adversity From the National Comorbidity Survey Replication Adolescent Supplement (NCS-A)

**eTable 4.** Definitions of How Each Adversity Was Defined

**eTable 5.** Range and Point Estimates of Odds Ratios and Corresponding PAFs of the Association Between Different Types of Childhood Adversity and Health Outcomes

**eTable 6.** Annual US Cases of Unhealthy Behaviors and Disease Markers and Annual US Deaths Attributable to Different Types of Childhood Adversity

### **eReferences**

This supplementary material has been provided by the authors to give readers additional information about their work.

**eTable 1. Search Terms Used for Electronic Databases**

| Variable                          |    | Terms                                                                                                                                                                                                                                                                                                                                                                                                                                                                                                                                                                                                                                                                                                                                                                             |
|-----------------------------------|----|-----------------------------------------------------------------------------------------------------------------------------------------------------------------------------------------------------------------------------------------------------------------------------------------------------------------------------------------------------------------------------------------------------------------------------------------------------------------------------------------------------------------------------------------------------------------------------------------------------------------------------------------------------------------------------------------------------------------------------------------------------------------------------------|
| Childhood                         | 1  | childhood development/ or early childhood development/ or infant development/ or adolescent development/ or developmental psychology/ or adolescent psychology/ or child psychology/ or adolescent/ or child/ or infant/                                                                                                                                                                                                                                                                                                                                                                                                                                                                                                                                                          |
|                                   | 2  | ("Child" or "Childhood" or "Children" or "School age" or "Early life" or "Early-life" or "Infant" or "Infancy" or "Toddler" or "Youth" or "Adolescent" or "Adolescence").ti,ab.                                                                                                                                                                                                                                                                                                                                                                                                                                                                                                                                                                                                   |
|                                   | 3  | 1 or 2                                                                                                                                                                                                                                                                                                                                                                                                                                                                                                                                                                                                                                                                                                                                                                            |
| Adversity                         | 4  | stress/ or chronic stress/ or environmental stress/ or psychological stress/ or social stress/ or deprivation/ or sexual abuse/ or incest/ or rape/ or child abuse/ or domestic violence/ or intimate partner violence/ or pedophilia/ or physical abuse/ or battered child syndrome/ or child neglect/ or domestic violence/ or emotional abuse/ or exposure to violence/ or trauma/ or emotional trauma/ or parental death/ or parental absence/ or divorce/ or marital separation/ or divorced persons/ or widowers/ or widows/ or institutionalization/ or orphanages/ or residential care institutions/ or orphans/ or social deprivation/ or disadvantaged/ or homeless/ or food deprivation/ or hunger/ or starvation/ or shelters/ or Spouse Abuse/ or family separation/ |
|                                   | 5  | ((Family or parent*) adj3 (disorder or abuse or mental or suicid* or psychopatholog* or jail or prison or incarcerat*)).ti,ab.                                                                                                                                                                                                                                                                                                                                                                                                                                                                                                                                                                                                                                                    |
|                                   | 6  | (Adversity OR Adverse experience OR Adverse childhood experience OR ACES OR Early-life stress OR Maltreat* OR Violen* OR Abuse* OR Domestic violence OR Victim* OR Family violence OR Childhood family violence OR Family conflict OR Interpersonal violence OR Parental Loss OR Parental death OR Parental separation OR Institutional rearing OR Institutional* OR Orphan* OR Neglect OR Enrichment OR Cognitive stimulation OR Social stimulation OR Homeless* OR Food insecurity OR Material deprivation OR Disadvantage).ti,ab.                                                                                                                                                                                                                                              |
| Childhood adversity               | 7  | 4 or 5 or 6                                                                                                                                                                                                                                                                                                                                                                                                                                                                                                                                                                                                                                                                                                                                                                       |
| Meta-analyses only                | 8  | 3 and 7                                                                                                                                                                                                                                                                                                                                                                                                                                                                                                                                                                                                                                                                                                                                                                           |
|                                   | 9  | meta-analysis.pt.                                                                                                                                                                                                                                                                                                                                                                                                                                                                                                                                                                                                                                                                                                                                                                 |
|                                   | 10 | meta-analysis/                                                                                                                                                                                                                                                                                                                                                                                                                                                                                                                                                                                                                                                                                                                                                                    |
|                                   | 11 | (meta-analys* or meta analys* or metaanalys* or (quantitativ* adj5 review*) or (quantitativ* adj5 overview*) or (quantitativ* adj5 synthesis*)).ti,ab.                                                                                                                                                                                                                                                                                                                                                                                                                                                                                                                                                                                                                            |
| Childhood adversity meta-analyses | 12 | 9 or 10 or 11                                                                                                                                                                                                                                                                                                                                                                                                                                                                                                                                                                                                                                                                                                                                                                     |
|                                   | 13 | 8 and 12                                                                                                                                                                                                                                                                                                                                                                                                                                                                                                                                                                                                                                                                                                                                                                          |

| Variable                 |    | Terms                                                                                                                                                                                                                                                                                                                                                                                                                                                                                                                                                                                                    |
|--------------------------|----|----------------------------------------------------------------------------------------------------------------------------------------------------------------------------------------------------------------------------------------------------------------------------------------------------------------------------------------------------------------------------------------------------------------------------------------------------------------------------------------------------------------------------------------------------------------------------------------------------------|
|                          |    | Then add specific outcome terms as below.                                                                                                                                                                                                                                                                                                                                                                                                                                                                                                                                                                |
| Stroke/CVD/Heart disease | 14 | exp heart diseases/ or exp vascular diseases/ or exp Ischemia/ or cerebrovascular disorders/ or cerebrovascular trauma/ or stroke/                                                                                                                                                                                                                                                                                                                                                                                                                                                                       |
|                          | 15 | (Ischemia OR Ischemic OR Ischemic heart disease OR Myocardial ischemia OR Cardiometabolic OR Cardiometabolic diseases OR Cardiovascular OR Infarction OR Myocardial infarction OR Acute myocardial infarction OR Heart attack OR Stroke OR Cerebrovascular accident OR Cerebral stroke OR Cerebral infarction OR Brain infarction OR Brain ischemia).ti,ab.                                                                                                                                                                                                                                              |
|                          | 16 | 14 or 15                                                                                                                                                                                                                                                                                                                                                                                                                                                                                                                                                                                                 |
|                          | 17 | 13 and 16                                                                                                                                                                                                                                                                                                                                                                                                                                                                                                                                                                                                |
| Glucose                  | 14 | glucose/ or blood glucose/ or Glucose Tolerance Test/ or Glycated Hemoglobin A/                                                                                                                                                                                                                                                                                                                                                                                                                                                                                                                          |
|                          | 15 | (Glucose OR Blood glucose OR Plasma glucose OR Glucose tolerance OR HbA1c OR Hb A1c OR HemoglobinA1c OR Hemoglobin A1c OR Glycated hemoglobin OR Fasting glucose OR Fasting plasma glucose OR Fasting blood glucose).ti,ab.                                                                                                                                                                                                                                                                                                                                                                              |
|                          | 16 | 14 or 15                                                                                                                                                                                                                                                                                                                                                                                                                                                                                                                                                                                                 |
|                          | 17 | 13 and 16                                                                                                                                                                                                                                                                                                                                                                                                                                                                                                                                                                                                |
| Inflammation             | 14 | Inflammation/ or cytokines/ or exp interleukins/ or Immunologic Factors/ or tumor necrosis factor-alpha/ or exp tumor necrosis factors/ or autoimmune diseases/ or acute-phase proteins/ or c-reactive protein/                                                                                                                                                                                                                                                                                                                                                                                          |
|                          | 15 | (Inflammatory markers or Inflammation or Inflammatory or Inflammatory biomarker or Pro Inflammatory or Proinflammation or Pro inflammatory markers or Pro inflammatory phenotype or Chronic Inflammation or Immune Function or Autoimmune or Autoimmunity or Peripheral immune system or Host defence or Host defense or Cytokine or Peripheral cytokine or Pro inflammatory cytokines or C reactive protein or C reactive protein or CRP or hsCRP or Interleukin 6 or IL 6 or Interleukin 10 or IL 10 or Tumor necrosis factor or Tumor necrosis factor alpha or TNF or TNF alpha or Fibrinogen).ti,ab. |
|                          | 16 | 14 or 15                                                                                                                                                                                                                                                                                                                                                                                                                                                                                                                                                                                                 |
|                          | 17 | 13 and 16                                                                                                                                                                                                                                                                                                                                                                                                                                                                                                                                                                                                |
| Type 2 Diabetes          | 14 | Diabetes Mellitus/ or Diabetes Mellitus, Type 2/ or diabetes complications/ or diabetes mellitus, lipotrophic/                                                                                                                                                                                                                                                                                                                                                                                                                                                                                           |
|                          | 15 | (Type II diabetes OR Type 2 diabetes OR Type 2 diabetes mellitus OR Type II diabetes mellitus OR Diabetes mellitus OR Non-insulin-dependent diabetes or T2D OR T2DM).ti,ab.                                                                                                                                                                                                                                                                                                                                                                                                                              |

|  |    |           |
|--|----|-----------|
|  | 16 | 14 or 15  |
|  | 17 | 13 and 16 |

| Variable            |    | Terms                                                                                                                                                                                                                                                                                                                                                        |
|---------------------|----|--------------------------------------------------------------------------------------------------------------------------------------------------------------------------------------------------------------------------------------------------------------------------------------------------------------------------------------------------------------|
| Obesity             | 14 | obesity/ or obesity, abdominal/ or obesity, morbid/ or pediatric obesity/ or Overweight/ or body constitution/ or "body weights and measures"/ or body fat distribution/ or adiposity/ or body mass index/ or body size/ or body weight/ or exp waist circumference/ or waist-height ratio/ or body surface area/ or skinfold thickness/ or waist-hip ratio/ |
|                     | 15 | (Obese OR Obesity OR "Body fat" OR "Body fat distribution" OR Adiposity OR "Central adiposity" OR "Waist circumference" OR "Waist-to-hip ratio" OR Overweight OR "Abdominal obesity" OR "Fat mass" OR "Body composition" OR "Body mass index" OR "Body-mass index" OR BMI).ti,ab.                                                                            |
|                     | 16 | 14 or 15                                                                                                                                                                                                                                                                                                                                                     |
|                     | 17 | 13 and 16                                                                                                                                                                                                                                                                                                                                                    |
|                     |    |                                                                                                                                                                                                                                                                                                                                                              |
| Hypertension        | 14 | Blood Pressure/ or hypertension/ or essential hypertension/ or arterial pressure/ or venous pressure/                                                                                                                                                                                                                                                        |
|                     | 15 | (Blood pressure OR Elevated blood pressure OR High blood pressure OR Hypertension OR Hypertensive).ti,ab.                                                                                                                                                                                                                                                    |
|                     | 16 | 14 or 15                                                                                                                                                                                                                                                                                                                                                     |
|                     | 17 | 13 and 16                                                                                                                                                                                                                                                                                                                                                    |
| Tobacco             | 14 | exp Tobacco Smoking/ or exp "Tobacco Use"/ or "Tobacco Use Disorder"/                                                                                                                                                                                                                                                                                        |
|                     | 15 | (tobacco* or cigar* or smok* or nicot*).ti,ab.                                                                                                                                                                                                                                                                                                               |
|                     | 16 | 14 or 15                                                                                                                                                                                                                                                                                                                                                     |
|                     | 17 | 13 and 16                                                                                                                                                                                                                                                                                                                                                    |
| Poor Diet           | 14 | exp diet/ or eating/ or Energy Intake/                                                                                                                                                                                                                                                                                                                       |
|                     | 15 | (nutri* or fruit or vegetable* or (health* adj3 eating) or diet* or food or food habit* or food intake or poor diet or unhealthy eating or unhealthy diet).ti,ab.                                                                                                                                                                                            |
|                     | 16 | 14 or 15                                                                                                                                                                                                                                                                                                                                                     |
|                     | 17 | 13 and 16                                                                                                                                                                                                                                                                                                                                                    |
| Physical inactivity | 14 | exp exercise/ or physical fitness/ or exp Sports/ or Physical Exertion/                                                                                                                                                                                                                                                                                      |

|  |    |                                                                                                                                |
|--|----|--------------------------------------------------------------------------------------------------------------------------------|
|  | 15 | (Exercise or physical* activ* or physical inactivity or inactiv* or sports or physical exertion or fitness or exercise).ti,ab. |
|  | 16 | (physical* adj5 (fit* or train* or therap* or activit*)).ti,ab.                                                                |
|  | 17 | 14 or 15 or 16                                                                                                                 |
|  | 18 | 13 and 17                                                                                                                      |

| Variable            |    | Terms                                                                                                                                                                                                                                                                                                                                                                                                                |
|---------------------|----|----------------------------------------------------------------------------------------------------------------------------------------------------------------------------------------------------------------------------------------------------------------------------------------------------------------------------------------------------------------------------------------------------------------------|
| Alcohol Consumption | 14 | alcohols/ or ethanol/ or blood alcohol content/ or exp Alcohol Drinking/ or Drinking/ or exp alcohol-related disorders/ or alcoholic intoxication/ or Alcoholic Beverages/ or Drinking Behavior/                                                                                                                                                                                                                     |
|                     | 15 | (drink* or liquor* or ethanol intake or alcohol* drink* or ethanol drink* or (alcohol adj3 consum*)).ti,ab.                                                                                                                                                                                                                                                                                                          |
|                     | 16 | 14 or 15                                                                                                                                                                                                                                                                                                                                                                                                             |
|                     | 17 | 13 and 16                                                                                                                                                                                                                                                                                                                                                                                                            |
| Sexual Behavior     | 14 | exp Reproductive Behavior/ or exp Sexual Behavior/ or HIV Infections/ or Sexually Transmitted Diseases/ or Safe sex/ or unsafe sex/ or sexual abstinence/ or exp contraceptive devices/ or contraceptive agents/ or birth control/ or pregnancy in adolescence/ or pregnancy, unwanted/ or pregnancy, unplanned/ or exp Contraception Behavior/                                                                      |
|                     | 15 | (sexual behav* or oral sex or anal sex or sex* orientation or unprotected sex or protected sex or unsafe sex or safe sex or high risk sex or extra marital or extramarital or intercourse or coital frequenc* or sexual partner* or multiple partner* or condom use* or condom* or reproductive behav* or contracepti* or family planning or sexually transmitted disease or STD or risky sex* or early sex*).ti,ab. |
|                     | 16 | (pregnan* adj3 (teen* or adolescen* or youth* or school-age*)).ti,ab.                                                                                                                                                                                                                                                                                                                                                |
|                     | 17 | 14 or 15 or 16                                                                                                                                                                                                                                                                                                                                                                                                       |
|                     | 18 | 13 and 17                                                                                                                                                                                                                                                                                                                                                                                                            |
| Illicit Drug use    | 14 | Drug-Seeking Behavior/ or amphetamine-related disorders/ or cocaine-related disorders/ or drug overdose/ or inhalant abuse/ or marijuana abuse/ or exp opioid-related disorders/ or phencyclidine abuse/ or substance abuse, intravenous/ or substance abuse, oral/ OR cannabis/ or exp street drugs/                                                                                                                |
|                     | 15 | ((drug OR substance) AND (misuse OR abuse OR dependence) OR (marijuana or cannabis or recreational drug* or street drug* or drug* or substance use or cocaine or amphetamine or opioid or opiate*)).ti,ab.                                                                                                                                                                                                           |
|                     | 16 | 14 or 15                                                                                                                                                                                                                                                                                                                                                                                                             |
|                     | 17 | 13 and 16                                                                                                                                                                                                                                                                                                                                                                                                            |

| Variable                  |    | Terms                                                                                                                                                                                                                                                                                                                                                                                                                                                                                                                                                                                                    |
|---------------------------|----|----------------------------------------------------------------------------------------------------------------------------------------------------------------------------------------------------------------------------------------------------------------------------------------------------------------------------------------------------------------------------------------------------------------------------------------------------------------------------------------------------------------------------------------------------------------------------------------------------------|
| Cancer                    | 14 | exp Neoplasms/                                                                                                                                                                                                                                                                                                                                                                                                                                                                                                                                                                                           |
|                           | 15 | (Astrocytoma*OR blastoma* or brain tumors or cancer* or carcinoma* or craniopharyngioma* or ependymoma* or histiocytoma* or glioma* or histiocytosis or leukemia* or lymphoma* or melanoma* or mesothelioma* or mycosis fungoides or myelodysplastic syndrome* or myeloma* or neoplasm* or osteosarcoma* or papillomatosis or paraganglioma* or pheochromocytoma* or sarcoma* or retinoblastoma* or rhabdomyosarcoma* or sezary syndrome* or tumor* or waldenstrom* macroglobulinemia or wilm* tumor).ti,ab.                                                                                             |
|                           | 16 | 14 or 15                                                                                                                                                                                                                                                                                                                                                                                                                                                                                                                                                                                                 |
|                           | 17 | 13 and 16                                                                                                                                                                                                                                                                                                                                                                                                                                                                                                                                                                                                |
| Chronic Lower Respiratory | 14 | Pulmonary Disease, Chronic Obstructive/ or respiratory tract diseases/ or bronchial diseases/ or asthma/ or bronchiectasis/ or bronchitis/ or bronchiolitis/ or bronchitis, chronic/ or lung diseases/                                                                                                                                                                                                                                                                                                                                                                                                   |
|                           | 15 | (respiratory disease or chronic obstructive pulmonary disease or COPD or chronic bronchitis or emphysema or airway obstruction or respiratory tract disease or obstructive lung disease or bronchiectasis or Bronchiectasis or chronic respiratory disease, chronic lung disease, chronic obstructive lung disease, chronic airway limitation, CAL, lung disorder, asthma, obstructive lung function, lung function, spirometry, pulmonary function testing or asthma or wheeze or wheezing or bronchiolitis or bronchitis or cystic fibrosis or interstitial lung disease or pulmonary fibrosis).ti,ab. |
|                           | 16 | 14 or 15                                                                                                                                                                                                                                                                                                                                                                                                                                                                                                                                                                                                 |
|                           | 17 | 13 and 16                                                                                                                                                                                                                                                                                                                                                                                                                                                                                                                                                                                                |
| Suicide                   | 14 | suicide/ or suicide, attempted/                                                                                                                                                                                                                                                                                                                                                                                                                                                                                                                                                                          |
|                           | 15 | suicid*.ti,ab.                                                                                                                                                                                                                                                                                                                                                                                                                                                                                                                                                                                           |
|                           | 16 | 14 or 15                                                                                                                                                                                                                                                                                                                                                                                                                                                                                                                                                                                                 |
|                           | 17 | 13 and 16                                                                                                                                                                                                                                                                                                                                                                                                                                                                                                                                                                                                |
| Microbial agents          | 14 | exp bacterial infections/ or infection/ or exp virus diseases/ or exp parasitic diseases/ or exp Communicable Diseases/                                                                                                                                                                                                                                                                                                                                                                                                                                                                                  |
|                           | 15 | (Intestinal infectious diseases OR Tuberculosis OR bacterial diseases OR spirochetal diseases OR chlamydiae OR Rickettsioses OR Viral infectio* OR and prion infectio* OR viral fever and viral hemorrhagic fever OR herpesviruses OR Viral hepatitis OR viral disease OR virus OR Mycoses OR Protozoal diseases OR Helminthiasis OR                                                                                                                                                                                                                                                                     |

|  |    |                                                                                                                                                                              |
|--|----|------------------------------------------------------------------------------------------------------------------------------------------------------------------------------|
|  |    | Pediculosis OR acariasis OR infectio* OR parasit* OR Bacteri* OR infectious disease OR influenza OR pneumonia OR septicemia OR communicable OR transmissable disease).ti,ab. |
|  | 16 | 14 or 15                                                                                                                                                                     |
|  | 17 | 13 and 16                                                                                                                                                                    |

| Variable                                                                    |    | Terms                                                                                                                                                                                                                                                                                                                                                                                                                                                                                                                                                                                                                         |
|-----------------------------------------------------------------------------|----|-------------------------------------------------------------------------------------------------------------------------------------------------------------------------------------------------------------------------------------------------------------------------------------------------------------------------------------------------------------------------------------------------------------------------------------------------------------------------------------------------------------------------------------------------------------------------------------------------------------------------------|
| Toxic agents (lead, particulate air pollution, environmental tobacco smoke) | 14 | environmental pollutants/ or air pollutants/ or soil pollutants/ or water pollutants/ or hazardous substances/ or pesticides/ or Lead/ or air pollution/ or environmental exposure/ or inhalation exposure/ or occupational exposure/ or radiation exposure/ or noise/ or petroleum pollution/ or traffic-related pollution/ or waste products/ or exp poisoning/ or gas poisoning/ or carbon monoxide poisoning/ or exp heavy metal poisoning/ or lead poisoning/ or air pollution/ or air pollution, indoor/ or air pollution, radioactive/ or tobacco smoke pollution/ or exp Water Pollution/ or Tobacco Smoke Pollution/ |
|                                                                             | 15 | (asbestos or lead or pollut* or benzene or carbon monoxide or ozone, nitrogen dioxide or sulfur dioxide or particulate matter or second-hand smok* or toxic agent* or toxic* or air pollution or toxin or anthrax or amines or aromatic or anthrax or arsenic or chemical* or chromium or environment* smok* or hazardous metals or mold or mould or nickel dust or noise or air contaminat* or dust or radiation or radon or uranium).ti,ab.                                                                                                                                                                                 |
|                                                                             | 16 | 14 or 15                                                                                                                                                                                                                                                                                                                                                                                                                                                                                                                                                                                                                      |
|                                                                             | 17 | 13 and 16                                                                                                                                                                                                                                                                                                                                                                                                                                                                                                                                                                                                                     |
|                                                                             |    |                                                                                                                                                                                                                                                                                                                                                                                                                                                                                                                                                                                                                               |
| Motor vehicle                                                               | 14 | Accidents, Traffic/ or motor vehicles/                                                                                                                                                                                                                                                                                                                                                                                                                                                                                                                                                                                        |
|                                                                             | 15 | (traffic accidents OR motor vehicle accidents OR mva or motor vehicle collision).ti,ab.                                                                                                                                                                                                                                                                                                                                                                                                                                                                                                                                       |
|                                                                             | 16 | ((accident* OR crash* OR collision* OR collide*) adj5 (car OR automobile* OR vehicle* OR traffic* OR road)).ti,ab.                                                                                                                                                                                                                                                                                                                                                                                                                                                                                                            |
|                                                                             | 17 | 14 or 15 or 16                                                                                                                                                                                                                                                                                                                                                                                                                                                                                                                                                                                                                |
|                                                                             | 18 | 13 and 17                                                                                                                                                                                                                                                                                                                                                                                                                                                                                                                                                                                                                     |
| Firearms                                                                    | 14 | Firearms/ or Wounds, Gunshot/                                                                                                                                                                                                                                                                                                                                                                                                                                                                                                                                                                                                 |
|                                                                             | 15 | (firearm* OR gun OR guns OR handgun*).ti,ab.                                                                                                                                                                                                                                                                                                                                                                                                                                                                                                                                                                                  |
|                                                                             | 16 | 14 or 15                                                                                                                                                                                                                                                                                                                                                                                                                                                                                                                                                                                                                      |
|                                                                             | 17 | 13 and 16                                                                                                                                                                                                                                                                                                                                                                                                                                                                                                                                                                                                                     |

| Variable                          |    | Terms                                                                                                                                                                            |
|-----------------------------------|----|----------------------------------------------------------------------------------------------------------------------------------------------------------------------------------|
| Accidents/ non-intentional injury | 14 | accidents/ or accidental falls/ or accidents, home/ or accidents, occupational/ or drowning/ or exp "Wounds and Injuries"/ or "Drug-Related Side Effects and Adverse Reactions"/ |
|                                   | 15 | (transport accident OR falls OR trip* OR drown OR accident* OR injur* OR accidental exposure or misadventure or non-intentional injury).ti,ab.                                   |
|                                   | 16 | 14 or 15                                                                                                                                                                         |
|                                   | 17 | 13 and 16                                                                                                                                                                        |
| Alzheimer's                       | 14 | Alzheimer Disease/                                                                                                                                                               |
|                                   | 15 | Alzheimer*                                                                                                                                                                       |
|                                   | 16 | 14 or 15                                                                                                                                                                         |
|                                   | 17 | 13 and 16                                                                                                                                                                        |
| LDL Cholesterol/Lipids            | 14 | Cholesterol/ or lipoproteins/ or lipoproteins, hdl/ or lipoproteins, ldl/ or Triglycerides/                                                                                      |
|                                   | 15 | (Cholesterol OR High density lipoprotein OR High-density lipoprotein OR HDL OR Low density lipoprotein OR Low-density lipoprotein OR LDL OR Triglycerides OR TAG).ti,ab.         |
|                                   | 16 | 14 or 15                                                                                                                                                                         |
|                                   | 17 | 13 and 16                                                                                                                                                                        |



**eFigure.** Screening Flow Chart of a Systematic Review of Meta-Analyses

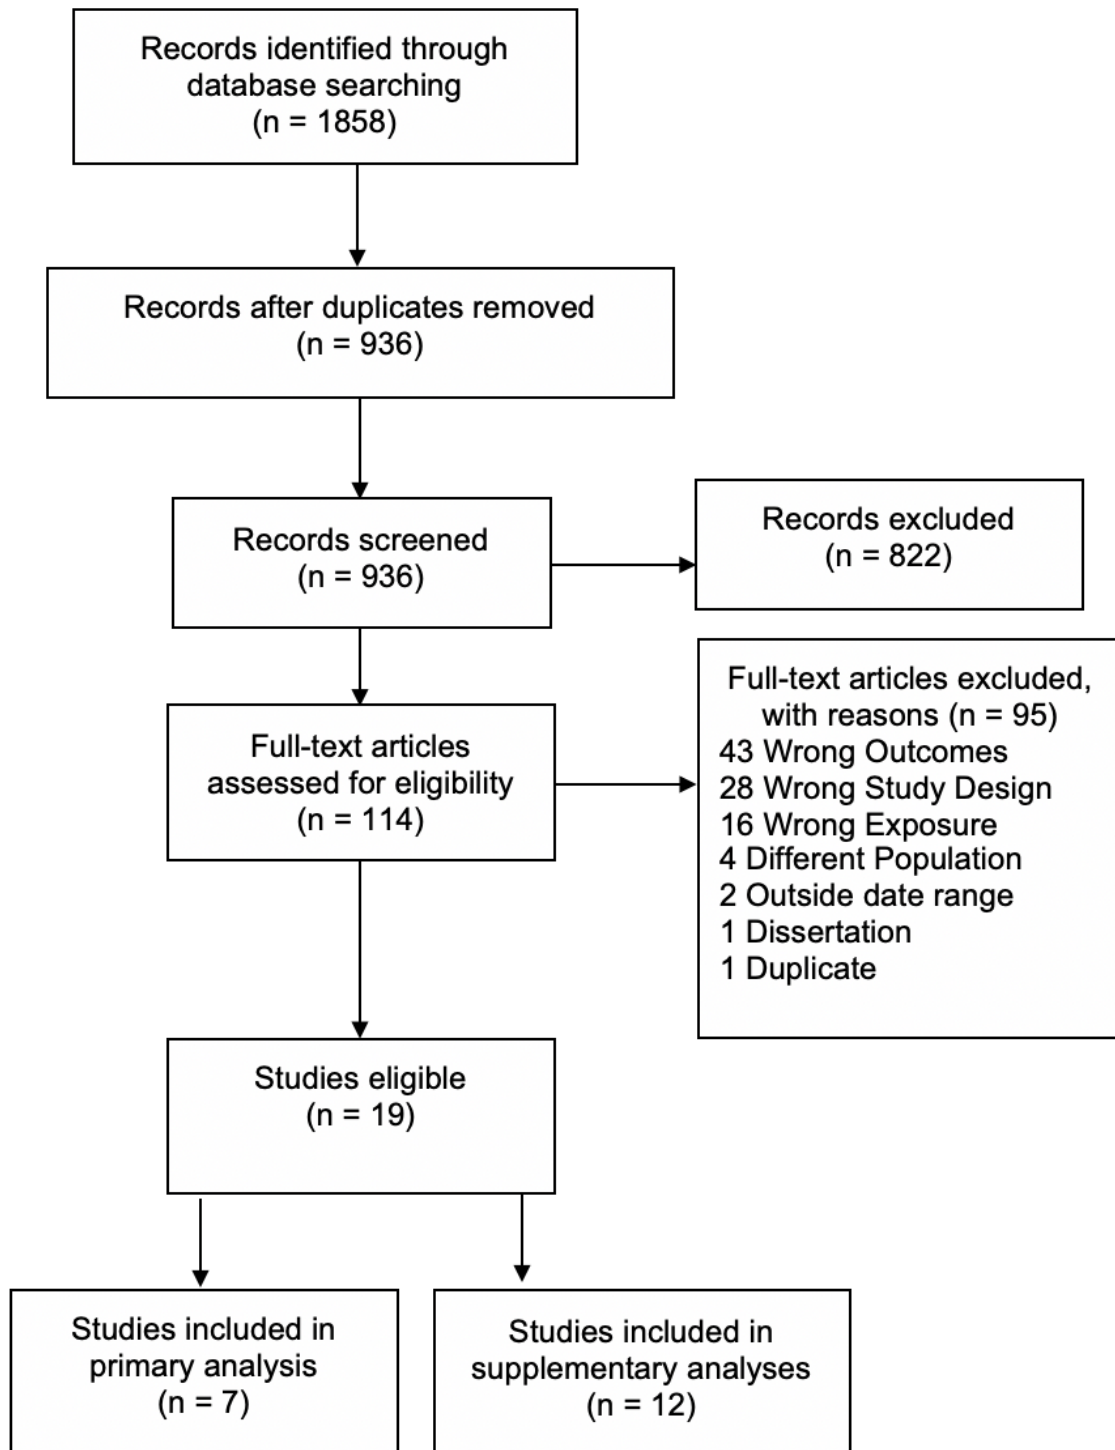

**eTable 2.** References of Meta-Analyses Included in the Estimates of Associations Between Childhood Adversity and Health Outcomes by Exposure Examined

|                                                |                       | 1 CA | 2 CAs | 3 CAs | 4+ CAs | Any adversity | Physical abuse   | Sexual abuse       | Emotional abuse  | Neglect   |
|------------------------------------------------|-----------------------|------|-------|-------|--------|---------------|------------------|--------------------|------------------|-----------|
| <b>Unhealthy behaviors and disease markers</b> |                       |      |       |       |        |               |                  |                    |                  |           |
| <b>Tobacco</b>                                 | <b>Range</b>          | 1, 2 | 2     | 2     | 2, 3   |               | 4                |                    | 4                | 4         |
|                                                | <b>Point estimate</b> | 1    |       |       | 3      |               |                  |                    |                  |           |
| <b>Physical inactivity</b>                     | <b>Range</b>          | 2    | 2     | 2     | 2, 3   |               | 4                |                    |                  |           |
|                                                | <b>Point estimate</b> |      |       |       | 3      |               |                  |                    |                  |           |
| <b>Alcohol use</b>                             | <b>Range</b>          | 1, 2 | 2     | 2     | 2, 3   |               | 4                |                    | 4                | 4         |
|                                                | <b>Point estimate</b> | 1    |       |       | 3      |               |                  |                    |                  |           |
| <b>Illicit drug use</b>                        | <b>Range</b>          | 1, 2 | 2     | 2     | 2, 3   |               | 4                |                    | 4                | 4         |
|                                                | <b>Point estimate</b> | 1    |       |       | 3      |               |                  |                    |                  |           |
| <b>Metabolic syndrome</b>                      |                       |      |       |       |        | 5a            |                  |                    |                  |           |
| <b>Inflammation<sup>b</sup></b>                | <b>Range</b>          |      |       |       |        | 6, 7          | 7                | 7                  | 7                |           |
|                                                | <b>Point estimate</b> |      |       |       |        | 7             |                  |                    |                  |           |
| <b>STIs</b>                                    |                       |      |       |       | 3      |               | 4                |                    | 4                | 4         |
| <b>Obesity</b>                                 | <b>Range</b>          | 1    |       |       | 8      |               | 4, 9, 10, 11, 12 | 9, 10, 11, 12, 13  | 4, 9, 10, 11, 12 | 4, 11, 12 |
|                                                | <b>Point estimate</b> |      |       |       |        |               | 9                | 9                  | 10               | 4         |
| <b>Disease outcomes</b>                        |                       |      |       |       |        |               |                  |                    |                  |           |
| <b>Diabetes</b>                                | <b>Range</b>          | 1, 2 | 2     | 2     | 2, 3   |               | 4, 14            | 14                 | 4                | 4, 14     |
|                                                | <b>Point estimate</b> | 1    |       |       | 3      |               | 4                |                    |                  | 4         |
| <b>Suicide</b>                                 | <b>Range</b>          | 2    | 2     | 2     | 2, 3   |               | 4, 15, 16, 17    | 15, 16, 17, 18, 19 | 4, 15, 17        | 4, 16     |
|                                                | <b>Point estimate</b> |      |       |       | 2      |               | 4                | 19                 | 15               | 4         |
| <b>Stroke</b>                                  |                       | 2    | 2     | 2     | 2      |               | 4                |                    |                  | 4         |
| <b>CLRD</b>                                    | <b>Range</b>          | 1, 2 | 2     | 2     | 2, 3   |               | 4                |                    |                  |           |
|                                                | <b>Point estimate</b> | 1    |       |       | 3      |               |                  |                    |                  |           |
| <b>Cancer</b>                                  |                       | 1    |       |       | 3      |               | 4                |                    |                  |           |
| <b>Heart disease</b>                           | <b>Range</b>          | 1, 2 | 2     | 2     | 2, 3   |               | 4                |                    | 4                | 4         |
|                                                | <b>Point estimate</b> | 1    |       |       | 3      |               |                  |                    |                  |           |
| <b>Hypertension</b>                            |                       |      |       |       |        |               | 4                |                    |                  | 4         |

CA: childhood adversity; CLRD: chronic lower respiratory disease; STI: sexually transmitted infection, [specifically human immunodeficiency virus (HIV), syphilis and ICD-10 codes A50-A64 (infections with a predominantly sexual mode of transmission)]. a Exposure was specifically  $\geq 2$  CAs. b: Outcome specifically elevated CRP ( $>3\text{mg/L}$  in a high sensitivity CRP test).

Table A2 presents references for the meta-analyses that were included in the range and point estimates of the association between different exposures of CA and health outcomes. The point estimate was extracted from the meta-analytic risk estimate that reflected the largest number of empirical datasets, with one exception for the association between 4+ CAs and suicide attempts. Here, the point estimate reflecting the largest number of empirical datasets was not consistent with observed data on the total number of suicide deaths, and the alternate point estimate was used.

**eTable 3.** Prevalence of Childhood Adversity From the National Comorbidity Survey Replication Adolescent Supplement (NCS-A)<sup>20</sup>

| Adversity category | Prevalence (%) | Standard Error | Items included in ACE Category                                                                                                                                                                                                                                                                                                                                     |
|--------------------|----------------|----------------|--------------------------------------------------------------------------------------------------------------------------------------------------------------------------------------------------------------------------------------------------------------------------------------------------------------------------------------------------------------------|
| Any Adversity      | 58.3           | 1.3            | Parental death, parental divorce, other parent loss, parent mental illness, parent substance use, parent criminal behavior, family violence, physical abuse, sexual abuse, emotional abuse, neglect, and economic adversity.                                                                                                                                       |
| ≥ 2 Adversities    | 33.8           | 1.57           | 2 or more of the adversities listed in the Any ACEs items                                                                                                                                                                                                                                                                                                          |
| 1 Adversity        | 24.0           | 1.0            | Exactly one of the 12 outcomes above                                                                                                                                                                                                                                                                                                                               |
| 2 Adversities      | 14.8           | 0.9            | Exactly 2 of the adversities listed in the Any Adversity items                                                                                                                                                                                                                                                                                                     |
| 3 Adversities      | 9.1            | 0.8            | Exactly 3 of the adversities listed in the Any Adversity items                                                                                                                                                                                                                                                                                                     |
| 4+ Adversities     | 9.9            | 0.8            | 4 or more of the adversities listed in the Any Adversity items                                                                                                                                                                                                                                                                                                     |
| Physical abuse     | 4.2            | 0.5            | A guardian slapping, hitting, pushing, grabbing, shoving or throwing something at the respondent often, kicking, biting, hitting with a fist, “beating up”, choking, burning, scalding, or threatening the respondent with a knife or gun often or sometimes, or reporting that the respondent was “badly beaten up by your parents or the people who raised you”. |
| Emotional abuse    | 5.9            | 0.7            | A guardian insulting, swearing, shouting, yelling, screaming, or threatening to hit the respondent often.                                                                                                                                                                                                                                                          |
| Sexual abuse       | 4.4            | 0.4            | Respondent reports of any rape or other inappropriate sexual touching.                                                                                                                                                                                                                                                                                             |
| Neglect            | 2.2            | 0.5            | Reports of inadequate food, medical care, clothing or supervision, or doing age-inappropriate chores.                                                                                                                                                                                                                                                              |

**eTable 4.** Definitions of How Each Adversity Was Defined

| Adversity category       | Definition                                                                                                                                                                                                                                                                                                                                                         | Source measure                                                                                             | Reliability statistics              |
|--------------------------|--------------------------------------------------------------------------------------------------------------------------------------------------------------------------------------------------------------------------------------------------------------------------------------------------------------------------------------------------------------------|------------------------------------------------------------------------------------------------------------|-------------------------------------|
| Physical abuse           | A guardian slapping, hitting, pushing, grabbing, shoving or throwing something at the respondent often, kicking, biting, hitting with a fist, “beating up”, choking, burning, scalding, or threatening the respondent with a knife or gun often or sometimes, or reporting that the respondent was “badly beaten up by your parents or the people who raised you”. | Conflicts Tactics Scale <sup>21</sup>                                                                      | Cronbach's alpha: .86 <sup>22</sup> |
| Emotional abuse          | A guardian insulting, swearing, shouting, yelling, screaming, or threatening to hit the respondent often.                                                                                                                                                                                                                                                          | Conflicts Tactics Scale                                                                                    | Cronbach's alpha: .79 <sup>22</sup> |
| Sexual abuse             | Respondent reports of any rape or other inappropriate sexual touching.                                                                                                                                                                                                                                                                                             | Composite International Diagnostic Interview (CIDI) <sup>23</sup> .                                        | -                                   |
| Neglect                  | Reports of inadequate food, medical care, clothing or supervision, or doing age-inappropriate chores.                                                                                                                                                                                                                                                              | Sourced from those used in child welfare investigations <sup>24</sup> .                                    | -                                   |
| Parental death           | Reported mother died or father died before the age of 18.                                                                                                                                                                                                                                                                                                          | -                                                                                                          | -                                   |
| Parental divorce         | Reported parental separation/divorce as a reason why respondent does not live with either parent continuously their whole life.                                                                                                                                                                                                                                    | -                                                                                                          | -                                   |
| Other parent loss        | Either adopted after age 2 or foster care at any age or separated from parents for other reason or lived with other relatives or foster home or detention center before age of 16.                                                                                                                                                                                 | -                                                                                                          | -                                   |
| Parent mental illness    | Either mother or father major depression, generalized anxiety disorder, or panic (yes to symptoms, all or most of childhood, with either treatment or impairment)                                                                                                                                                                                                  | Family History Research Diagnostic Criteria (FHRDC) Interview and its extensions <sup>25,26</sup>          | -                                   |
| Parent substance use     | Either mother or father having a problem with alcohol or drugs                                                                                                                                                                                                                                                                                                     | Family History Research Diagnostic Criteria (FHRDC) Interview and its extensions <sup>25,26</sup>          | -                                   |
| Parent criminal behavior | Either mother or father involved in criminal activities, arrested or sent to prison                                                                                                                                                                                                                                                                                | Composite International Diagnostic Interview (CIDI)                                                        | -                                   |
| Family violence          | Parents often hit, shoved, pushed, grabbed or slapped each other while growing up or respondent witnessed physical fights at home under the age of 18.                                                                                                                                                                                                             | Conflict Tactics Scale <sup>21</sup> and Composite International Diagnostic Interview (CIDI) <sup>23</sup> | -                                   |
| Economic adversity       | Either received welfare or had single-parent household where parent often didn't work or no female head and no male head                                                                                                                                                                                                                                           | Developed for use in the NCS.                                                                              | -                                   |

**eTable 5.** Range and Point Estimates of Odds Ratios and Corresponding PAFs of the Association Between Different Types of Childhood Adversity and Health Outcomes

|                                                |                       | Physical abuse               |                              | Emotional abuse             |                              | Sexual abuse                 |                              | Neglect                      |                               |
|------------------------------------------------|-----------------------|------------------------------|------------------------------|-----------------------------|------------------------------|------------------------------|------------------------------|------------------------------|-------------------------------|
| Outcome                                        |                       | Odds or Risk ratio           | PAF                          | Odds or Risk ratio range    | PAF range                    | Odds or Risk ratio range     | PAF range                    | Odds or Risk ratio range     | PAF range                     |
| <b>Unhealthy behaviors and disease markers</b> |                       |                              |                              |                             |                              |                              |                              |                              |                               |
| <b>Tobacco smoking</b>                         |                       | 1.55<br>(1.09 – 2.21)        | .023<br>(.004 – .048)        | 1.7<br>(1.55 – 1.87)        | .040<br>(.031 - .049)        |                              |                              | 1.2<br>(.98 – 1.48)          | .004<br>(.000 - .010)         |
| <b>Illicit drug use</b>                        |                       | 1.92<br>(1.67 – 2.2)         | .037<br>(.027 - .048)        | 1.41<br>(1.11 – 1.79)       | .024<br>(.006 - .045)        |                              |                              | 1.36<br>(1.21 – 1.54)        | .008<br>(.005 - .012)         |
| <b>Physical inactivity</b>                     |                       | 1.04<br>(.86 – 1.26)         | .002<br>(-.006 - .011)       |                             |                              |                              |                              |                              |                               |
| <b>Alcohol consumption</b>                     |                       | 1.26<br>(1.03 – 1.55)        | .011<br>(.001 - .023)        | 1.27<br>(1.11 – 1.46)       | .016<br>(.006 - .026)        |                              |                              | 1.09<br>(.87 – 1.35)         | .002<br>(-.003 - .008)        |
| <b>STIs</b>                                    | <b>HIV</b>            | 2.51<br>(1.16 – 5.42)        | .060<br>(.007 - .157)        | 1.82<br>(1.34 – 2.47)       | .046<br>(.020 - .080)        |                              |                              | 2.5<br>(0.77 – 8.15)         | .032<br>(-.005 - .136)        |
|                                                | <b>Other STIs</b>     | 1.53<br>(1.13 – 2.07)        | .022<br>(.005 – .043)        | 1.56<br>(1.26 – 1.93)       | .032<br>(.015 – .052)        |                              |                              | 1.26<br>(1.08 – 1.46)        | .006<br>(.002 – .010)         |
| <b>Obesity</b>                                 | <b>Range (95% CI)</b> | 1.26 – 1.32<br>(1.06 - 1.64) | .011 - .013<br>(.003 - .026) | 1.2 – 1.36<br>(1.06 – 1.71) | .012 - .021<br>(.004 - .040) | 1.22 – 1.73<br>(1.05 – 1.93) | .010 - .031<br>(.002 - .039) | 1.07 – 1.36<br>(0.97 - 1.55) | .002 - .008<br>(-.001 - .012) |
|                                                | <b>Point estimate</b> | 1.29                         | .012                         | 1.36                        | .021                         | 1.43                         | .019                         | 1.07                         | .002                          |
| <b>Inflammation</b>                            |                       | 1.03<br>(0.65 – 1.6)         | .001<br>(-.015 - .025)       | 1.12<br>(0.9 – 1.44)        | .007<br>(-.006 - .025)       | 1.00<br>(0.83 – 1.2)         | .000<br>(-.008 - .009)       |                              |                               |
| <b>Disease outcomes</b>                        |                       |                              |                              |                             |                              |                              |                              |                              |                               |
| <b>Heart Disease</b>                           |                       | 1.5<br>(1.4 – 1.9)           | .021<br>(.017 - .036)        | 1.7<br>(1.5 – 1.9)          | .040<br>(.029 - .050)        |                              |                              | 1.35<br>(1.17 – 1.55)        | .008<br>(.004 - .012)         |

|                     |                                  |                              |                               |                              |                              |                              |                              |                              |                               |
|---------------------|----------------------------------|------------------------------|-------------------------------|------------------------------|------------------------------|------------------------------|------------------------------|------------------------------|-------------------------------|
|                     |                                  |                              |                               |                              |                              |                              |                              |                              |                               |
| <b>Cancer</b>       |                                  | 1.26<br>(0.97 – 1.65)        | .011<br>(-.001 - .027)        |                              |                              |                              |                              |                              |                               |
| <b>CLRD</b>         | <b>Bronchitis,<br/>emphysema</b> | 1.39<br>(1.19 – 1.62)        | .016<br>(.008 - .025)         |                              |                              |                              |                              |                              |                               |
|                     | <b>Asthma</b>                    | 1.74<br>(1.15 – 2.62)        | .030<br>(.006 - .064)         |                              |                              |                              |                              |                              |                               |
| <b>Suicide</b>      | <b>Range<br/>(95% CI)</b>        | 2.52 – 4.12<br>(1.66 – 7.34) | .060 - .116<br>(.027 - .210)  | 2.49 – 3.49<br>(1.64 - 4.74) | .081 - .128<br>(.036 - .181) | 1.89 – 3.98<br>(1.66 – 6.05) | .038 - .116<br>(.028 - .182) | 1.76 – 1.95<br>(0.71 – 4.36) | .016 - .020<br>(-.006 - .069) |
|                     | <b>Point<br/>estimate</b>        | 3.40                         | .092                          | 2.49                         | .081                         | 1.89                         | .038                         | 1.95                         | .020                          |
| <b>Diabetes</b>     | <b>Range<br/>(95% CI)</b>        | 1.01 – 1.3<br>(0.79 - 1.42)  | .000 - .012<br>(-.009 - .017) | 1.19<br>(0.74 – 1.93)        | 0.011<br>(-.016 - .052)      | 1.39<br>(1.28 – 1.52)        | .017<br>(.012 - .022)        | 1.11 – 1.92<br>(0.97 – 2.57) | .002 - .020<br>(-.001 - .033) |
|                     | <b>Point<br/>estimate</b>        | 1.01                         | .000                          | 1.19                         | .011                         | 1.39                         | .017                         | 1.11                         | .002                          |
| <b>Stroke</b>       |                                  | 1.76<br>(0.56 – 5.51)        | 0.031<br>(-.019 - .159)       |                              |                              |                              |                              | 3.00<br>(0.99 – 9.1)         | .042<br>(.000 - .151)         |
| <b>Hypertension</b> |                                  | 1.16<br>(0.94 – 1.44)        | .007<br>(-.003 - .018)        |                              |                              |                              |                              | 1.04<br>(0.78 – 1.39)        | .001<br>(-.005 - .009)        |

CLRD: chronic lower respiratory disease; STI: sexually transmitted infection, [specifically human immunodeficiency virus (HIV), syphilis, gonorrhea, trichomoniasis, genital herpes, human papillomavirus, sexually transmitted hepatitis B virus].

Odds ratios (ORs) or risk ratios (RRs) were extracted from a systematic review of meta-analyses on the association of childhood adversity with health outcomes. The PAF was calculated using the formula:  $PAF = (P * (RR - 1)) / (1 + (P * (RR - 1)))$  where P is the prevalence of the exposure (experiencing at least four types of adversity), and RR is the risk ratio (we substituted ORs where RRs were not available). Where multiple meta-analytic estimates were available for the same outcome, we used the lowest and highest estimates to construct a range of ORs/RRs and used the lowest and highest bounds of the 95% confidence interval reported across the included meta-analyses to provide the 95% CI reported in brackets. Where only one meta-analytic estimate was available, the point estimate and 95% CI from that meta-analysis is reported. Reported in the “Point estimate” row is the meta-analytic estimate that reflected the largest number of empirical datasets. The PAF range was calculated using the range of OR estimates; where only one estimate was available (i.e. no range), the PAF range was calculated using the 95% CI.

When the OR/RR range includes one and the PAF range includes zero, this indicates that an included meta-analysis did not find that specific childhood adversity exposure to be associated with increased risk of that outcome.

**eTable 6.** Annual US Cases of Unhealthy Behaviors and Disease Markers and Annual US Deaths Attributable to Different Types of Childhood Adversity

|                                                |                   |                           | Physical abuse          | Emotional abuse         | Sexual abuse            | Neglect                 |
|------------------------------------------------|-------------------|---------------------------|-------------------------|-------------------------|-------------------------|-------------------------|
| <b>Unhealthy Behaviors and Disease Markers</b> |                   |                           |                         |                         |                         |                         |
|                                                |                   | <b>Number of cases</b>    | <b>Cases due to CA</b>  |
| <b>Tobacco smoking</b>                         |                   | 34,000,000 <sup>27</sup>  | 767,667                 | 1,348,507               |                         | 148,945                 |
| <b>Illicit drug use</b>                        |                   | 28,500,000 <sup>28</sup>  | 1,060,271               | 673,132                 |                         | 223,946                 |
| <b>Physical inactivity</b>                     |                   | 107,489,253 <sup>29</sup> | 180,279                 |                         |                         |                         |
| <b>Alcohol consumption</b>                     |                   | 14,400,000 <sup>30</sup>  | 155,549                 | 225,795                 |                         | 28,456                  |
| <b>STIs</b>                                    | <b>HIV</b>        | 984,000 <sup>31</sup>     | 58,684                  | 45,409                  |                         | 31,435                  |
|                                                | <b>Other STIs</b> | 66,578,000 <sup>31</sup>  | 1,449,755               | 2,129,382               |                         | 378,660                 |
| <b>Obesity</b>                                 |                   | 107,998,681 <sup>32</sup> | 1,299,595               | 2,246,183               | 2,005,393               | 166,062                 |
| <b>Inflammation</b>                            |                   | 95,189,462 <sup>33</sup>  | 119,788                 | 669,203                 | 0                       |                         |
| <b>Disease outcomes</b>                        |                   |                           |                         |                         |                         |                         |
|                                                |                   | <b>Number of deaths</b>   | <b>Deaths due to CA</b> |
| <b>Heart Disease</b>                           |                   | 659,041                   | 13,555                  | 26,139                  |                         | 5,036                   |
| <b>Cancer</b>                                  |                   | 599,601                   | 6,477                   |                         |                         |                         |

|                     |                                  |           |        |        |       |        |
|---------------------|----------------------------------|-----------|--------|--------|-------|--------|
| <b>CLRD</b>         | <b>Bronchitis,<br/>emphysema</b> | 7,720     | 124    |        |       |        |
|                     | <b>Asthma</b>                    | 3,524     | 107    |        |       |        |
| <b>Suicide</b>      |                                  | 47,511    | 4,351  | 3,839  | 1,790 | 973    |
| <b>Diabetes</b>     |                                  | 87,647    | 37     | 972    | 1,479 | 212    |
| <b>Stroke</b>       |                                  | 150,005   | 4,640  |        |       | 6,322  |
| <b>Hypertension</b> |                                  | 36,524    | 244    |        |       | 32     |
| <b>Total</b>        |                                  | 1,596,663 | 29,837 | 31,184 | 3,269 | 12,736 |

CLRD: chronic lower respiratory disease; STI: sexually transmitted infection, [specifically human immunodeficiency virus (HIV), syphilis, gonorrhea, trichomoniasis, genital herpes, human papillomavirus, sexually transmitted hepatitis B virus].

Point estimates of the PAFs of childhood adversity for each outcome were applied to the number of cases of each unhealthy behavior and disease marker to derive the number of cases of health behaviors attributable to different levels of exposure to childhood adversity (shown in top panel) and applied to the number of deaths for each of the causes of death in 2019 to derive the number of deaths attributable to childhood adversity exposures (shown in bottom panel). The number of cases of each health behavior was sourced from the referenced data. The number of deaths for each outcome were sourced from the CDC WONDER database for 2019. The bottom total row refers only to the causes of death. It was created by summing each column and reflects the number of deaths attributable to each type of childhood adversity, i.e., the number of deaths associated with childhood physical abuse, emotional abuse, sexual abuse and neglect.



## eReferences

1. Bellis MA, Hughes K, Ford K, Ramos Rodriguez G, Sethi D, Passmore J. Life Course Health Consequences and Associated Annual Costs of Adverse Childhood Experiences across Europe and North America: A Systematic Review and Meta-Analysis. *The Lancet Public health*. 2019;4(10):e517-e528.
2. Petruccelli K, Davis J, Berman T. Adverse Childhood Experiences and Associated Health Outcomes: A Systematic Review and Meta-Analysis. *Child Abuse Negl*. 2019;97:104127.
3. Hughes K, Bellis MA, Hardcastle KA, et al. The Effect of Multiple Adverse Childhood Experiences on Health: A Systematic Review and Meta-Analysis. *The Lancet Public health*. 2017;2(8):e356-e366.
4. Norman RE, Byambaa M, De R, Butchart A, Scott J, Vos T. The Long-Term Health Consequences of Child Physical Abuse, Emotional Abuse, and Neglect: A Systematic Review and Meta-Analysis. *PLoS medicine*. 2012;9(11):e1001349.
5. Jakubowski KP, Cundiff JM, Matthews KA. Cumulative Childhood Adversity and Adult Cardiometabolic Disease: A Meta-Analysis. *Health Psychol*. 2018;37(8):701-715.
6. Kuhlman KR, Horn SR, Chiang JJ, Bower JE. Early Life Adversity Exposure and Circulating Markers of Inflammation in Children and Adolescents: A Systematic Review and Meta-Analysis. *Brain Behav Immun*. 2020;86:30-42.
7. Baumeister D, Akhtar R, Ciufolini S, Pariante CM, Mondelli V. Childhood Trauma and Adulthood Inflammation: A Meta-Analysis of Peripheral C-Reactive Protein, Interleukin-6 and Tumour Necrosis Factor-Alpha. *Molecular Psychiatry*. 2016;21(5):642-649.
8. Wiss DA, Brewerton TD. Adverse Childhood Experiences and Adult Obesity: A Systematic Review of Plausible Mechanisms and Meta-Analysis of Cross-Sectional Studies. *Physiol Behav*. 2020;223:112964.
9. Danese A, Tan M. Childhood Maltreatment and Obesity: Systematic Review and Meta-Analysis. *Molecular Psychiatry*. 2014;19(5):544-554.
10. Hemmingsson E, Johansson K, Reynisdottir S. Effects of Childhood Abuse on Adult Obesity: A Systematic Review and Meta-Analysis. *Obesity reviews : an official journal of the International Association for the Study of Obesity*. 2014;15(11):882-893.
11. Solmi M, Kohler CA, Stubbs B, et al. Environmental Risk Factors and Nonpharmacological and Nonsurgical Interventions for Obesity: An Umbrella Review of Meta-Analyses of Cohort Studies and Randomized Controlled Trials. *European journal of clinical investigation*. 2018;48(12):e12982.
12. Wang Y, Wu B, Yang H, Song X. The Effect of Childhood Abuse on the Risk of Adult Obesity. *Annals of Clinical Psychiatry*. 2015;27(3):175-184.
13. Irish L, Kobayashi I, Delahanty DL. Long-Term Physical Health Consequences of Childhood Sexual Abuse: A Meta-Analytic Review. *Journal of pediatric psychology*. 2010;35(5):450-461.
14. Huang H, Yan P, Shan Z, et al. Adverse Childhood Experiences and Risk of Type 2 Diabetes: A Systematic Review and Meta-Analysis. *Metabolism: clinical and experimental*. 2015;64(11):1408-1418.
15. Angelakis I, Gillespie EL, Panagioti M. Childhood Maltreatment and Adult Suicidality: A Comprehensive Systematic Review with Meta-Analysis. *Psychological Medicine*. 2019:No-Specified.

16. Castellvi P, Miranda-Mendizabal A, Pares-Badell O, et al. Exposure to Violence, a Risk for Suicide in Youths and Young Adults. A Meta-Analysis of Longitudinal Studies. *Acta Psychiatrica Scandinavica*. 2017;135(3):195-211.
17. Zatti C, Rosa V, Barros A, et al. Childhood Trauma and Suicide Attempt: A Meta-Analysis of Longitudinal Studies from the Last Decade. *Psychiatry Research*. 2017;256(Wilcox, H.C., & Wyman, P.A. (2016). Suicide prevention strategies for improving population health. *Child Adolesc. Psychiatr. Clin. N. Am.*, 25, 219-233. <http://dx.doi.org/10.1016/j.chc.2015.12.003>):353-358.
18. Devries KM, Mak JYT, Child JC, et al. Childhood Sexual Abuse and Suicidal Behavior: A Meta-Analysis. *Pediatrics*. 2014;133(5):e1331-e1344.
19. Ng QX, Yong BZJ, Ho CYX, Lim DY, Yeo W-S. Early Life Sexual Abuse Is Associated with Increased Suicide Attempts: An Update Meta-Analysis. *Journal of Psychiatric Research*. 2018;99(Yildirim, F., Kucukgoncu, S., Bestepe, E.E., & Yildirim, M.S. (2014). The relationship of childhood abuse and neglect with suicide attempts in an adult unipolar depression sample. *Noro Psikiyatri Arsivi*, 51, 2, 133<http://dx.doi.org/10.4274/npa.y6802>):129-141.
20. Kessler RC. National Comorbidity Survey: Adolescent Supplement (Ncs-a), 2001-2004. In: Inter-university Consortium for Political and Social Research [distributor]; 2017.
21. Straus MA. Measuring Intrafamily Conflict and Violence: The Conflict Tactics (Ct) Scales. *J Marriage Fam*. 1979;41(1):75-88.
22. Straus MA, Hamby SL, Boney-McCoy S, Sugarman DB. The Revised Conflict Tactics Scales (Cts2): Development and Preliminary Psychometric Data. In: Sage Publications; 1996:283-316.
23. Kessler RC, Üstün TB. The World Mental Health (Wmh) Survey Initiative Version of the World Health Organization (Who) Composite International Diagnostic Interview (Cidi). *Int J Methods Psychiatr Res*. 2004;13(2):93-121.
24. Courtney ME, Piliavin I, Grogan-Kaylor A, Nesmith A. Foster Youth Transitions to Adulthood: A Longitudinal View of Youth Leaving Care. *Child welfare*. 2001;80(6):685-717.
25. Endicott JA, N.; Spitzer, RL. . *Family History Research Diagnostic Criteria*. New York, NY: Biometrics Research, New York State Psychiatric Institute; 1978.
26. Kendler KS, Silberg JL, Neale MC, Kessler RC, Heath AC, Eaves LJ. The Family History Method: Whose Psychiatric History Is Measured? *Am J Psychiatry*. 1991;148(11):1501-1504.
27. Centers for Disease Control and Prevention. Current Cigarette Smoking among Adults in the United States. In: Office on Smoking and Health, ed2020.
28. Substance Abuse and Mental Health Services Administration. Key Substance Use and Mental Health Indicators in the United States: Results from the 2017 National Survey on Drug Use and Health. In: Department of Health and Human Services, ed. Vol HHS Publication No. SMA 18-5068, NSDUH Series H-53,. Rockville, MD: Center for Behavioral Health Statistics and Quality, Substance Abuse and Mental Health Services Administration,; 2018.
29. National Center for Health Statistics (US). Participation in Leisure-Time Aerobic and Muscle-Strengthening Activities That Meet the Federal 2008 Physical Activity Guidelines for Americans among Adults Aged 18 and over, by Selected Characteristics: United States, Selected Years 1998–2018. In: National Center for Health Statistics (US), ed. Vol Health, United States, 2019. Hyattsville (MD)2021.
30. SAMHSA, Center for Behavioral Health Statistics and Quality. 2019 National Survey on Drug Use and Health. Table 5.4a – Alcohol Use Disorder in Past Year among

- Persons Aged 12 or Older, by Age Group and Demographic Characteristics: Numbers in Thousands, 2018 and 2019. In:2019.
31. Kreisel KM, Spicknall IH, Gargano JW, et al. Sexually Transmitted Infections among Us Women and Men: Prevalence and Incidence Estimates, 2018. *Sexually Transmitted Diseases*. 2021;48(4).
  32. Hales CM, Carroll MD, Fryar CD, CL. O. Prevalence of Obesity and Severe Obesity among Adults: United States, 2017–2018. In. Vol NCHS Data Brief, no 360. Hyattsville, MD: National Center for Health Statistics,; 2020.
  33. Centers for Disease Control and Prevention (CDC), National Center for Health Statistics (NCHS). National Health and Nutrition Examination Survey Data. In: U.S. Department of Health and Human Services, ed. Hyattsville, MD2020.
